# Supplementary material
Source: PubMed Central journal article supplement (PMC3194986)
Supplement: supp_85_21_10989__1.pdf [file supp_85_21_10989__1.pdf]

# Fig. S1

## A Sizes of fosmid viral DNA fragments and their corresponding locations within the DEV genome

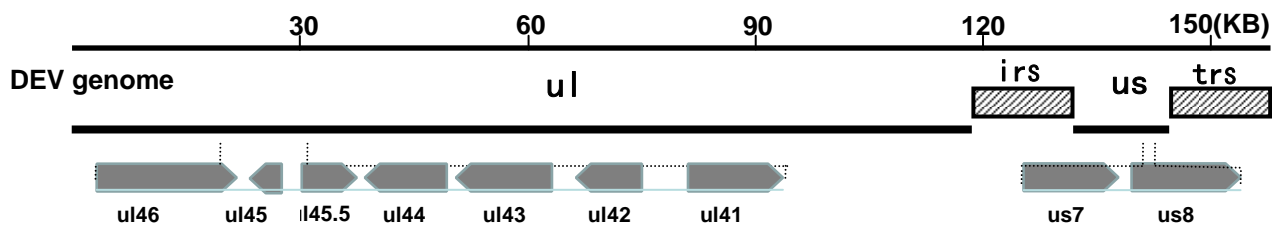

| Fosmid | Location in the genome (nt) | Size (bp) | Fosmid | Location in the genome (nt) | Size (bp) |
|--------|-----------------------------|-----------|--------|-----------------------------|-----------|
| A      | 1-41050                     | 41050     | L      | 69717-112962                | 43245     |
| B      | 1-42611                     | 42611     | M      | 71128-113565                | 42437     |
| C      | 1-42858                     | 42858     | N      | 87839-127216                | 39377     |
| D      | 1-44511                     | 44511     | O      | 98197-129146                | 30967     |
| E      | 36206-76520                 | 40314     | P      | 98972-126709                | 27737     |
| F      | 36852-75346                 | 38494     | Q      | 103945-143040               | 39095     |
| G      | 37026-75527                 | 38501     | R      | 108656-158091               | 49435     |
| H      | 38245-77308                 | 39065     | S      | 113668-158091               | 44423     |
| I      | 67695-103240                | 35545     | T      | 119308-158091               | 38783     |
| J      | 68314-109887                | 41573     | U      | 119308-3706                 | 42489     |
| K      | 68717-109996                | 41279     |        |                             |           |

## B Fosmid combinations used for virus generation and CPE induced by rescued viruses

| Set | Combinations     | CPE |
|-----|------------------|-----|
| 1   | <b>A+F+J+P+U</b> | +   |
| 2   | B+E+J+P+S        | -   |
| 3   | B+G+I+N+S        | -   |
| 4   | B+H+L+O+S        | -   |
| 5   | C+E+M+O+T        | -   |
| 6   | C+H+L+P+T        | -   |
| 7   | D+E+I+P+T        | -   |
| 8   | D+E+L+Q+T        | -   |
| 9   | <b>D+G+M+R</b>   | +   |
| 10  | <b>D+H+J+Q+T</b> | +   |

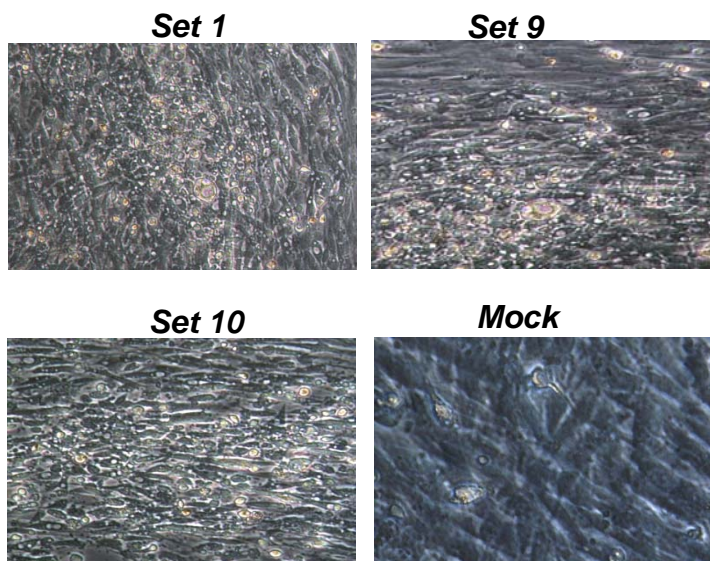

**Fig. S2**

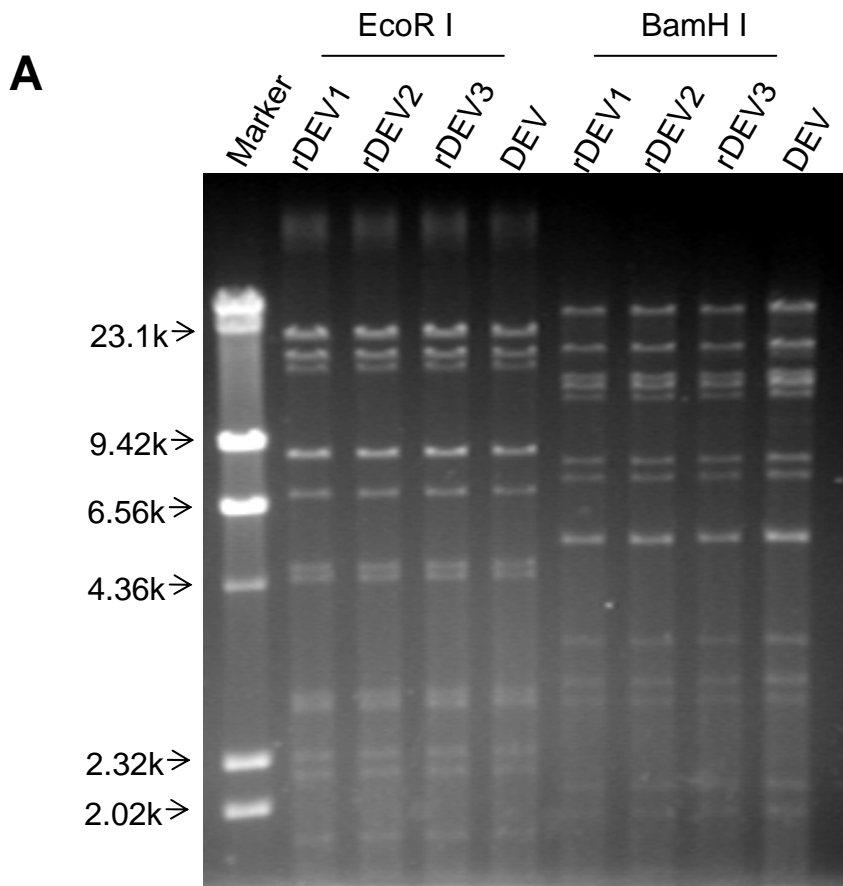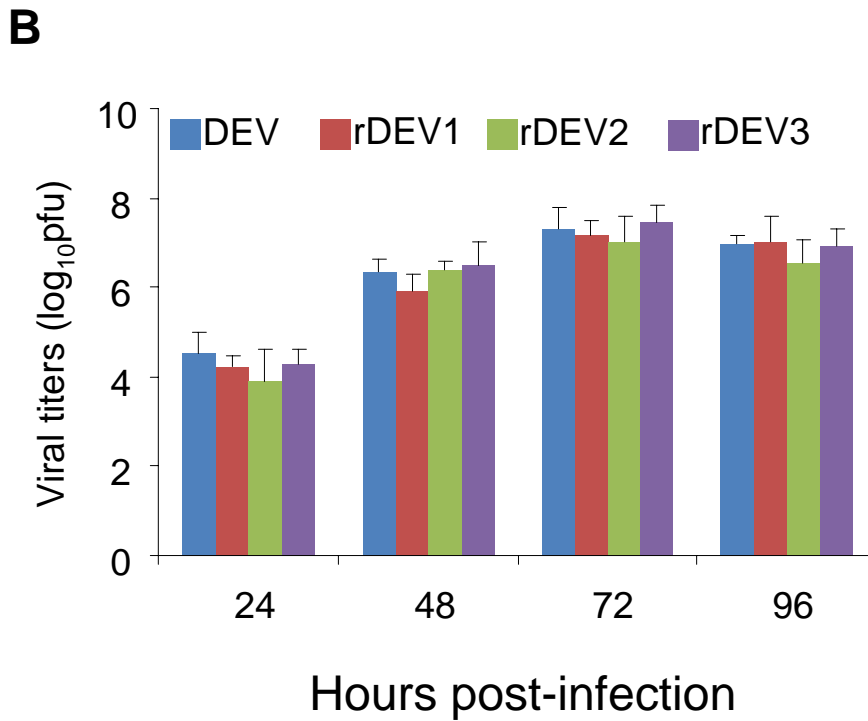

**Fig. S3**

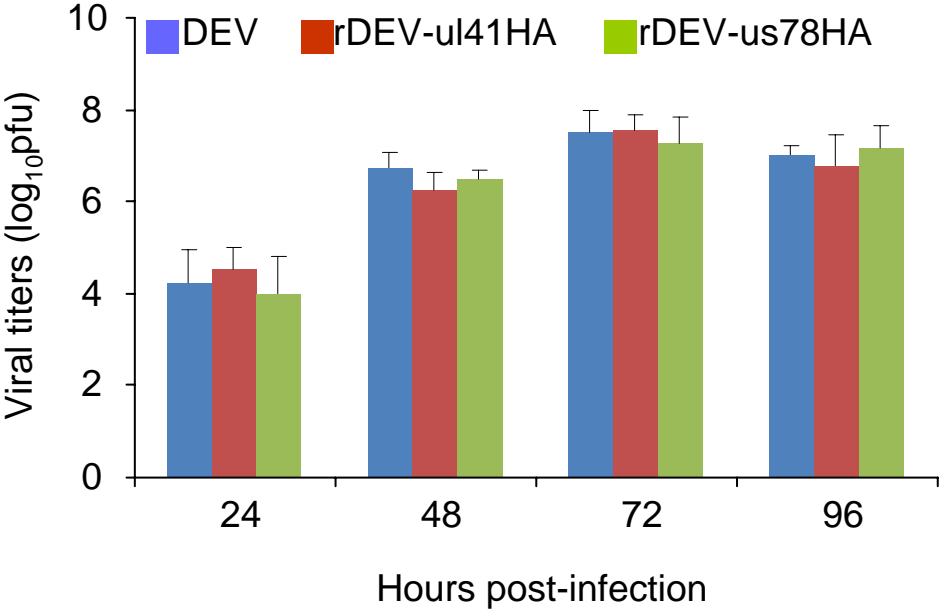

## Supplemental figure legends

**Figure S1. Rescue of the DEV from over-lapping fosmid DNAs.** **A.** Twenty-one fosmids containing DEV DNA fragments were selected from a DEV vaccine strain genome library. The position in the DEV genome and the lengths of the DNA fragments in these fosmids were confirmed by partial sequencing. **B.** Ten sets of DNA fragments from 4- or 5-fosmid combinations were used for the virus rescue. The DEV were regenerated from the fragment sets that are shown in italics and boldface. +, DEV specific CPE positive; -, DEV specific CPE negative.

**Figure S2. Characterization of the rescued DEVs.** **A.** The purified DNA genomes of the wild-type DEV and rescued DEVs (rDEV) were digested with EcoRI and BamHI and were separated by using pulsed field gel electrophoresis. Marker:  $\lambda$  DNA digested by Hind III. **B.** Chicken embryo fibroblasts (CEFs) were infected at an MOI of 0.01 with the wild-type DEV or rDEVs; cells were harvested at the indicated time points after inoculation and titrated in CEFs. Data presented are the means  $\pm$  standard deviations (SD) from three independent experiments.

**Figure S3. Replication of the recombinant DEV viruses in CEFs.** Chicken embryo fibroblasts (CEFs) were infected at an MOI of 0.01 with the wild-type DEV, rDEV-ul41HA, or rDEV-us78HA; cells were harvested at the indicated time points after inoculation and titrated in CEFs. Data presented are the means  $\pm$  standard deviations (SD) from three independent experiments.
